# A model to estimate regional demand for COVID-19 related hospitalizations

Johannes O. Ferstad, BA<sup>1+</sup>, Angela Gu, BS<sup>2+</sup>, Raymond Y. Lee, BA<sup>1</sup>, Isha Thapa, BA<sup>1</sup>, Andrew Y. Shin, MD<sup>3</sup>, Joshua A. Salomon, PhD<sup>4</sup>, Peter Glynn, PhD<sup>1</sup>, Nigam H. Shah, MBBS, PhD<sup>4,5</sup>, Arnold Milstein, MD<sup>4,5</sup>; Kevin Schulman, MD<sup>4,5\*</sup>, and David Scheinker, PhD<sup>1,3,5,6\*</sup>

<sup>1</sup>Department of Management Science and Engineering, Stanford University School of Engineering

<sup>2</sup>Department of Computer Science, Stanford University School of Engineering

<sup>3</sup>Department of Pediatrics, Stanford University School of Medicine

<sup>4</sup>Department of Medicine, Stanford University School of Medicine

<sup>5</sup>Clinical Excellence Research Center, Stanford University School of Medicine

<sup>6</sup>Department of PeriOperative Services, Lucile Packard Children's Hospital Stanford

+These authors served as co-first authors.

\*These authors served as co-senior authors.

Corresponding Author:

David Scheinker, PhD

Department of Management Science and Engineering

475 Via Ortega

Stanford, CA 94305-4121

[dscheink@stanford.edu](mailto:dscheink@stanford.edu)

650-683-5623

## ABSTRACT

COVID-19 has quickly become a global pandemic that threatens to overwhelm hospital facilities throughout the United States. In order to aid community and hospital leaders, we created an interactive, quantitative model that predicts the demand for hospitalization for patients with COVID-19 based on county-level population characteristics, data from the literature on COVID-19, and data from online repositories. Using this information as well as user inputs, the model estimates a time series of demand for intensive care beds and acute care beds as well as the availability of those beds. The model, available online, is designed to be intuitive and interactive so that local leaders with limited technical or epidemiological expertise may make decisions based on a variety of scenarios. This complements high-level models designed for public consumption and technically sophisticated models designed for use by epidemiologists. The model is actively being used by several academic medical centers and policy makers, and we believe that further access will continue to aid community and hospital leaders in their response to COVID-19.

## INTRODUCTION

Since the first case of coronavirus disease 2019 (COVID-19) in December 2019, it has been classified a global pandemic with over 529,000 confirmed cases across 199 countries as of March 26, 2020. [1, 2] A National Emergency was declared in the United States (US) on March 14, 2020 and the number of confirmed COVID-19 cases in the US was over 83,000 as of March 26, 2020. [2, 3] The rapid spread of COVID-19 in China and Italy led to severe shortages of hospital beds. [4, 5] Concerns about similar shortages in the US and relatively slow government testing have underlined the need to develop region-specific estimates of the number of people who may require hospitalization, plan social-distancing interventions, and identify potential shortages of hospital beds. [6, 7]

In order to plan their response, hospital and public health officials need to understand how many people in their area are likely to require hospitalization for COVID-19; how these numbers compare to the number of available intensive care and acute care beds; and how to project the impact of social-distancing measures on utilization. Since the majority of people with COVID-19 are asymptomatic and the rates of cases requiring hospitalization differ significantly across age groups, answering these questions requires understanding the epidemic and accounting for the specific vulnerabilities of the local population. [8, 9] The numbers of people in each age group differ significantly across US counties, as do the available hospital resources [10, 11]. Initial analyses of the potential impact of COVID-19 have spurred governmental action at the federal and state level; however, significant differences remain in the policies implemented across states and counties. [9, 12]

In order to help facilitate adequate and appropriate local responses, we developed a simple model to project the number of people in each county in the United States who are likely to require hospitalization as a result of COVID-19 given the age distribution of the county per the US Census. The model compares the projected number of individuals needing hospitalization to the publicly known numbers of available intensive and acute care beds and allows users to model the impact of social-distancing or other measures to slow the spread of the virus. The uncertainty surrounding the numbers of people infected and the rates of spread make it difficult to evaluate the accuracy of projections generated by complex epidemiological models. The model presented errs on the side of simplicity and transparency to allow non-specialist policy-makers to fully understand the logic and uncertainty associated with the estimates.

## THE PROJECTION MODEL

For each US county, the model accepts as an input the number of COVID-19 hospitalizations and the associated doubling time, if these are available. If these are not available, the model imports the latest number of confirmed cases from the USAFacts online repository and accepts user-entered parameters of the ratio of total cases to confirmed cases (e.g., 5:1) [8] and the COVID-19 population-level doubling time (e.g., 7 days) [13]. The effects of interventions that mitigate the spread of infection (such as social distancing) are simulated with user-entered parameters in the form of a prolonged doubling time and a start date for that new doubling time. These may be estimated based on the changes in doubling time associated with reductions in person-to-person contact. [21] County-specific hospitalization rates are derived from combining age-distributions derived from the US census [11] and age-group specific estimates of the case rates of severe symptoms, critical symptoms, and mortality (together morbidity) derived from Imperial College COVID-19 Response Team [9]. The default assumptions are that: people are admitted to the hospital on the day they test positive (the assumptions will change when testing begins for non-symptomatic people); those with severe and critical symptoms spend, respectively, 12 days in acute care and 7 days in intensive care; and 50% of each type of bed is available for COVID-19+ patients. [14, 15] The numbers of patients requiring each type of bed are compared to the numbers of

relevant beds derived from data from the American Hospital Association [10]. The detailed technical description of the model is available in our Technical Supplement.

To facilitate use by hospital and public health officials, the model is deployed through an interactive online website that allows users to generate dynamic, static, and spatial estimates of the number and rate of severe, critical, and mortality case rates for each county or group of counties. These data are displayed along with the number of intensive care and acute care hospital beds in the corresponding region.

The urgency of the challenge and widespread data sharing have led to the development of numerous models of COVID-19: models designed to share the most recent data on confirmed cases and deaths [16]; technical models intended for use by epidemiologists [17, 18, 21]; and models presenting high-level summaries of the potential for COVID-19 associated bed demand to overwhelm hospital capacity [9, 19, 22]. The model presented here fits the needs of local hospital and government leaders, many of whom lack access to trained epidemiologists or data analysts. The website allows such leaders to study projections of the spread of COVID-19 based on their county-level hospitalization information, if these are available, otherwise presents projections based on data from the rest of the US and assumptions from the literature. The model, deployed as a website, is relatively easy to understand as the underlying dynamics are specified in terms of assumptions interpretable to those with no specialist training.

As stakeholders gather data about the spread of COVID-19 in their region, the model permits them to tailor inputs and generate new estimates in real time. As new epidemiological data become available, the model is updated by those maintaining it with new age-specific rates of severe disease, critical disease, mortality and their associated LOSs. For example, the first update was from case-rates derived from data on Wuhan [20] to the case-rates derived from the Imperial report.

As expected, the model predicts US counties with large, older populations are likely to have the highest demand for hospital beds. Counties with a high number of confirmed cases are likely to be first to see the demand for beds exceed hospital bed availability. Furthermore, smaller counties with relatively few hospital beds are likely to see the demand for beds exceed hospital bed availability at lower fractions of the population being COVID-19+ (see Table 1). Local leaders in these vulnerable communities should pay particular attention to the case growth rate if they seek to tailor their response rapidly to predicted downstream resource constraints.

Our results suggest, in line with basic epidemiological principles, that hospitalization rates are very sensitive to contagion doubling time. Despite the uncertainty about doubling time, the model demonstrates that across a large set of assumptions efforts to increase hospital bed capacity are not on their own likely to be sufficient to ensure that hospital capacity meets demand.

When considering the limited healthcare resources anticipated, the need for strengthening collaborative operational planning and research between institutions and across the public and private sectors is paramount. While hospital leaders may be concerned with the impact of COVID-19 infections at their facility, our model assesses the potential impact of the epidemic at a county and state level. Assessing the regional impact can permit collaborative and coordinated planning between public health and hospital leaders facing an unprecedented challenge. Regional and state leaders are better equipped to understand the potential implications, such as funding and cost-sharing, of this epidemic across counties within a state. These conversations are facilitated by the ability to study several counties in a region.

One of the greatest challenges to continuously adjusting regional policies best tailored to meet the challenge of COVID-19 is that healthcare and political leaders lack familiarity with the concept of

exponential growth of a highly transmissible deadly pathogen—particularly one with a 3 to 14 days lag between infection and needing a hospital bed. Forecasting demand for hospital resources a week, to a few weeks ahead helps address that handicap.

There are several limitations to the model. First, projections related to the spread of a pandemic at this early stage are plagued with uncertainty about critical model parameters, e.g., the doubling time and the true number of cases in the population. To account for this, the model was designed to produce projections given current assumptions about parameters (with the option to update those variables as better data become available). Second, although estimates of disease propagation follow first-order evidence, important input parameters may not have been considered in the model which may affect hospitalization rates and bed availability. For example, assumptions on shared healthcare resources (such as the use of pediatric beds for adult hospitalization overflow) are not modifiable by users but only by those maintaining the model. Finally, the model estimates the effect of one or the summation of more than one intervention (by modification of the doubling time) but does not ascribe the individual impact of sequential interventions.

In this report, we describe an online, real-time, interactive simulation model to facilitate local policy making and regional coordination by providing estimates of hospital bed demand and the impact of measures to slow the spread of the infection.

## REFERENCES

- [1] World Health Organization. (2020, March 11). Coronavirus disease 2019 (COVID-19) Situation Report – 51. Retrieved from <https://www.who.int/docs/default-source/coronaviruse/situation-reports/20200311-sitrep-51-covid-19.pdf>
- [2] Center for Systems Science and Engineering at Johns Hopkins University. (2020). Coronavirus COVID-19 Global Cases. Retrieved from <https://coronavirus.jhu.edu/map.html> on March 19, 2020.
- [3] White House. (2020, March 13). Proclamation on Declaring a National Emergency Concerning the Novel Coronavirus Disease (COVID-19) Outbreak. Retrieved from <https://www.whitehouse.gov/presidential-actions/proclamation-declaring-national-emergency-concerning-novel-coronavirus-disease-covid-19-outbreak/>
- [4] Wu Z, McGoogan JM. Characteristics of and Important Lessons From the Coronavirus Disease 2019 (COVID-19) Outbreak in China: Summary of a Report of 72 314 Cases From the Chinese Center for Disease Control and Prevention. *JAMA*. Published online February 24, 2020. doi:10.1001/jama.2020.2648
- [5] Grasselli G, Pesenti A, Cecconi M. Critical Care Utilization for the COVID-19 Outbreak in Lombardy, Italy: Early Experience and Forecast During an Emergency Response. *JAMA*. Published online March 13, 2020. doi:10.1001/jama.2020.4031
- [6] Adalja AA, Toner E, Inglesby TV. Priorities for the US Health Community Responding to COVID-19. *JAMA*. Published online March 03, 2020. doi:10.1001/jama.2020.3413
- [7] The New York Times. (2020, March 17). U.S. Lags in Coronavirus Testing After Slow Response to Outbreak. Retrieved from <https://www.nytimes.com/interactive/2020/03/17/us/coronavirus-testing-data.html>
- [8] Li, R., Pei, S., Chen, B., Song, Y., Zhang, T., Yang, W., & Shaman, J. (2020). Substantial undocumented infection facilitates the rapid dissemination of novel coronavirus (SARS-CoV2). *Science*.
- [9] Imperial College COVID-19 Response Team. (2020, March 16). Impact of non-pharmaceutical interventions (NPIs) to reduce COVID19 mortality and healthcare demand. Retrieved from <https://www.imperial.ac.uk/media/imperial-college/medicine/sph/ide/gida-fellowships/Imperial-College-COVID19-NPI-modelling-16-03-2020.pdf>
- [10] American Hospital Association. (2018). AHA Annual Survey. 2018. Pennsylvania, PA: Wharton Research Data Services.
- [11] U.S. Census Bureau. (2019). American Community Survey 5-Year Data 2018 [Data file]. Retrieved from <https://www.census.gov/data/developers/data-sets/acs-5year/2018.html>
- [12] The New York Times. (2020, March 16). White House Takes New Line After Dire Report on Death Toll. Retrieved from <https://www.nytimes.com/2020/03/16/us/coronavirus-fatality-rate-white-house.html>
- [13] Li, Q., Guan, X., Wu, P., Wang, X., Zhou, L., Tong, Y., ... & Xing, X. (2020). Early transmission dynamics in Wuhan, China, of novel coronavirus–infected pneumonia. *New England Journal of Medicine*.
- [14] Yang, X., Yu, Y., Xu, J., Shu, H., Liu, H., Wu, Y., ... & Wang, Y. (2020). Clinical course and outcomes of critically ill patients with SARS-CoV-2 pneumonia in Wuhan, China: a single-centered, retrospective, observational study. *The Lancet Respiratory Medicine*.
- [15] Zhou, F., Yu, T., Du, R., Fan, G., Liu, Y., Liu, Z., ... & Guan, L. (2020). Clinical course and risk factors for mortality of adult inpatients with COVID-19 in Wuhan, China: a retrospective cohort study. *The Lancet*.

- [16] Dong, E., Du, H., & Gardner, L. (2020). An interactive web-based dashboard to track COVID-19 in real time. *The Lancet Infectious Diseases*.
- [17] Goh, Gabriel. (2020). Epidemic Calculator. Retrieved from <https://gabgoh.github.io/COVID/index.html>
- [18] Hill, Alison. (2020). Modeling COVID-19 Spread vs Healthcare Capacity. Retrieved from <https://alhill.shinyapps.io/COVID19seir/>
- [19] Jha, Ashish K. (2020). Caring for COVID-19 Patients – Can Hospitals around the Nation Keep Up? Retrieved from <https://globalepidemics.org/2020/03/17/caring-for-covid-19-patients/>
- [20] Surveillances, V. (2020). The Epidemiological Characteristics of an Outbreak of 2019 Novel Coronavirus Diseases (COVID-19)—China, 2020. *China CDC Weekly*, 2(8), 113-122.
- [21] Penn Medicine. (2020). COVID-19 Hospital Impact Model for Epidemics. Retrieved from <https://penn-chime.phl.io/>
- [22] IHME COVID-19 health service utilization forecasting team. Forecasting COVID-19 impact on hospital bed-days, ICU-days, ventilator days and deaths by US state in the next 4 months. *MedRxiv*. 26 March 2020.

**FIGURE 1:** Example output showing the model output simulating two interventions on April 1 and April 13 where the first intervention does not change the doubling time much, but the second one does. The plot is a hypothetical situation and not a forecast for the county shown.

- Santa Clara County has 1,573,714 people aged 0-59 and 348,486 people aged 60+.
- Assuming 50% of acute beds and 50% of ICU beds available to COVID-19 cases, Santa Clara County has 659 acute beds and 133 ICU beds for COVID-19 cases. You can modify the % of beds available to COVID-19 patients in the inputs. See Documentation tab for data source.
- Assuming no changes to the doubling time, the number of people requiring ICU beds will exceed the number of available ICU beds in 11 days.
- Assuming no changes to the doubling time, the number of people requiring acute beds will exceed the number of available acute beds in 14 days.
- If interventions lead to the input change in doubling time, then the number of people requiring ICU beds will exceed the number of available ICU beds in 12 days.
- If interventions lead to the input change in doubling time, the number of people requiring acute beds will exceed the number of available acute beds in 17 days.

|                                                           | Fatality<br>(Subset of Critical) | Critical | Severe | Hospitalization<br>(Critical + Severe) |
|-----------------------------------------------------------|----------------------------------|----------|--------|----------------------------------------|
| Population-specific case severity rate<br>(per 100 cases) | 0.91                             | 1.89     | 4.66   | 6.54                                   |

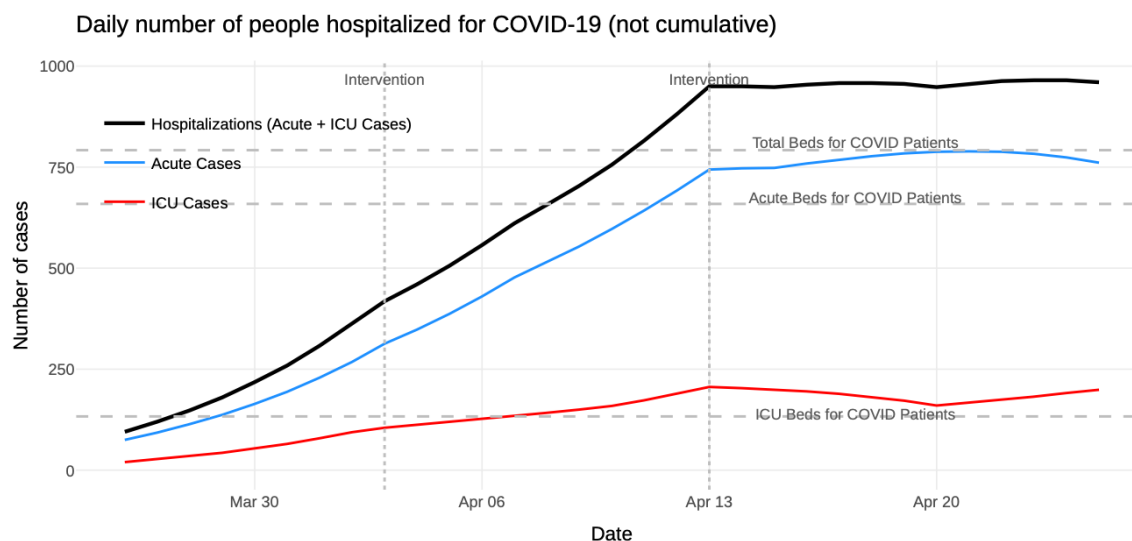

## FIGURE 2: US Map

Expected number of hospitalizations per 100 symptomatic cases  
(based on the age distribution of the county population)

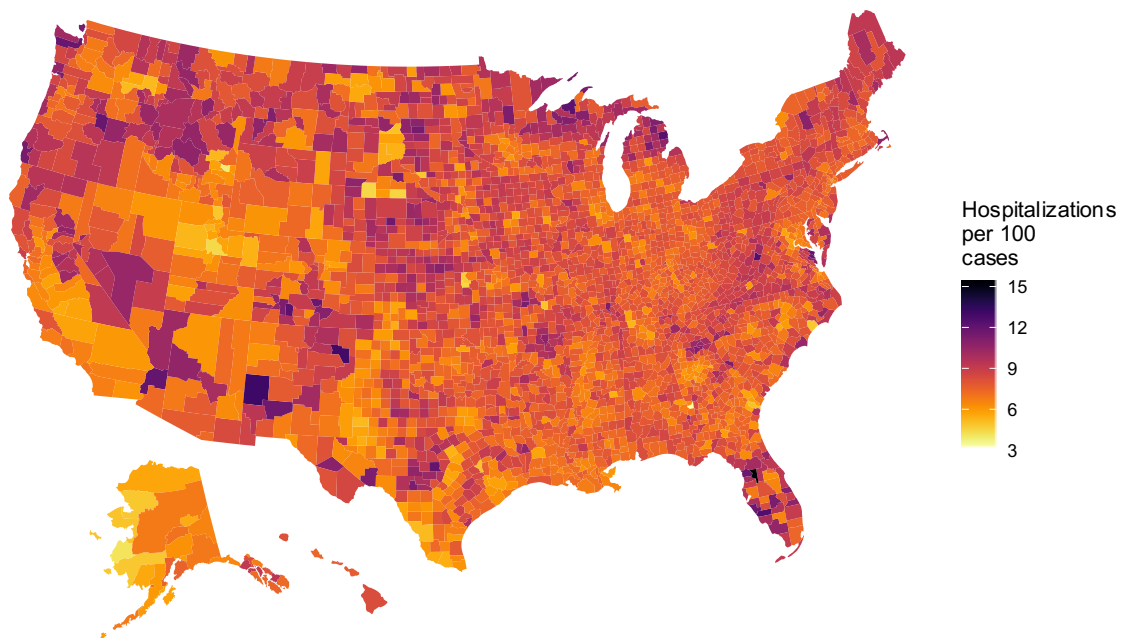



**TABLE 1: County Utilization with 1% of Population Symptomatic**

| <b>State</b>   | <b>County</b>     | <b>Population</b> | <b>Reported Cases on March 26</b> | <b>Number of Acute Beds</b> | <b>Number of ICU Beds</b> | <b>Acute Bed Utilization if 1% Symptomatic</b> | <b>ICU Bed Utilization if 1% Symptomatic</b> |
|----------------|-------------------|-------------------|-----------------------------------|-----------------------------|---------------------------|------------------------------------------------|----------------------------------------------|
| California     | Santa Cruz County | 273,765           | 25                                | 68                          | 6                         | 199%                                           | 936%                                         |
| Maryland       | Harford County    | 251,025           | 5                                 | 53                          | 6                         | 245%                                           | 917%                                         |
| Michigan       | Clinton County    | 77,896            | 6                                 | 23                          | 2                         | 176%                                           | 868%                                         |
| Massachusetts  | Plymouth County   | 512,135           | 101                               | 131                         | 16                        | 211%                                           | 763%                                         |
| Tennessee      | Hawkins County    | 56,402            | 1                                 | 16                          | 2                         | 202%                                           | 734%                                         |
| New Mexico     | Chaves County     | 65,459            | 3                                 | 18                          | 2                         | 172%                                           | 722%                                         |
| New Hampshire  | Rockingham County | 305,129           | 56                                | 64                          | 10                        | 265%                                           | 708%                                         |
| Minnesota      | Dakota County     | 418,201           | 21                                | 109                         | 12                        | 185%                                           | 660%                                         |
| Massachusetts  | Hampshire County  | 161,159           | 11                                | 34                          | 6                         | 233%                                           | 590%                                         |
| Ohio           | Delaware County   | 197,008           | 12                                | 43                          | 6                         | 216%                                           | 590%                                         |
| Wisconsin      | St. Croix County  | 87,917            | 4                                 | 45                          | 3                         | 95%                                            | 553%                                         |
| Alabama        | Baldwin County    | 208,107           | 4                                 | 95                          | 10                        | 122%                                           | 544%                                         |
| North Carolina | Chatham County    | 69,791            | 6                                 | 21                          | 4                         | 200%                                           | 539%                                         |
| Arizona        | Santa Cruz County | 46,584            | 1                                 | 16                          | 2                         | 142%                                           | 539%                                         |
| Florida        | Monroe County     | 76,325            | 11                                | 21                          | 4                         | 225%                                           | 538%                                         |
| Massachusetts  | Norfolk County    | 698,249           | 222                               | 328                         | 31                        | 110%                                           | 534%                                         |
| North Carolina | Rowan County      | 139,605           | 6                                 | 162                         | 6                         | 45%                                            | 529%                                         |
| Georgia        | Coweta County     | 140,516           | 10                                | 37                          | 5                         | 183%                                           | 512%                                         |
| Iowa           | Kossuth County    | 15,075            | 1                                 | 18                          | 1                         | 48%                                            | 495%                                         |
| California     | Placer County     | 380,077           | 30                                | 146                         | 20                        | 140%                                           | 489%                                         |

## Technical Supplement

### *Calculation of the Number of COVID-19+ People*

The model accepts as an input the number of COVID-19 hospitalizations and the associated doubling time, if these are available. If these are not available, for each US county, the model imports the latest total number of confirmed cases from the USAFacts online repository and accepts user-entered parameters of the ratio of total cases to confirmed cases (e.g., 10:1) [1] and the COVID-19 population-level doubling time (e.g., 7 days) [2]. Following a simple exponential model, the total number of COVID-19+ people on each subsequent day N is the product of the initial number of total cases and 2 to the power given by N divided by the doubling time input parameter. Users can simulate the effects of interventions that mitigate the spread of infection (such as social distancing) by entering new doubling times and dates for these interventions to take effect. If these are input, the number of COVID-19+ people on subsequent days is calculated using the new doubling time with the previous formula. Users are referred to online tools to estimate changes in doubling time associated with the impact of social-distancing interventions. [3]

### *Calculation of Hospitalization Rates*

County-specific age distributions are derived from the US census [4] and age-group specific estimates of the case rates of severe symptoms, critical symptoms, and mortality derived from Imperial College COVID-19 Response Team [5]. For each county, the proportion of each age group relative to the total population is calculated. Severe and critical symptom case-rates for each age group are weighted by these proportions, and the hospitalization rate is calculated as the sum of these weighted severe and critical symptom case-rates.

### *Calculation of Hospitalizations and Hospital Capacity*

The model includes parameters for the hospital length of stay for COVID-19+ patients with severe and critical symptoms set to, respectively, 12 days in acute care and 7 days in intensive care. Another parameter controls the percentage of each type of bed that is available for COVID-19+ patients (set to 50%). [6, 7] The number of patients with severe and critical symptoms requiring hospitalization each day is calculated assuming that patients are admitted to the hospital on the day they test positive (this assumption will change when testing begins more seriously for non-symptomatic people) and are discharged after their length of stay. The cumulative number of patients with severe and critical symptoms requiring hospitalization is estimated as the product of the corresponding hospitalization rate and cumulative number of COVID+ people in the population. The number of patients in hospital beds on a specific day is defined as the cumulative number of patients admitted up to that day minus the corresponding cumulative number of patients discharged.

Hospital capacity at county level is based on the number of hospital beds in each US county from the American Hospital Association. The acute care beds include general medical, surgical, and long-term acute care beds for adults. The intensive care unit beds include all adult intensive care unit beds other than neonatal [8]. As discussed above, the number of hospital beds available for COVID-19+ patients is an input parameter set to a default value of 50%.

## References

- [1] Li, R., Pei, S., Chen, B., Song, Y., Zhang, T., Yang, W., & Shaman, J. (2020). Substantial undocumented infection facilitates the rapid dissemination of novel coronavirus (SARS-CoV2). *Science*.
- [2] Li, Q., Guan, X., Wu, P., Wang, X., Zhou, L., Tong, Y., ... & Xing, X. (2020). Early transmission dynamics in Wuhan, China, of novel coronavirus-infected pneumonia. *New England Journal of Medicine*.
- [3] Penn Medicine. (2020). COVID-19 Hospital Impact Model for Epidemics. Retrieved from <https://penn-chime.phl.io/>

[4] U.S. Census Bureau. (2019). American Community Survey 5-Year Data 2018 [Data file]. Retrieved from <https://www.census.gov/data/developers/data-sets/acs-5year/2018.html>

[5] Imperial College COVID-19 Response Team. (2020, March 16). Impact of non-pharmaceutical interventions (NPIs) to reduce COVID19 mortality and healthcare demand. Retrieved from <https://www.imperial.ac.uk/media/imperial-college/medicine/sph/ide/gida-fellowships/Imperial-College-COVID19-NPI-modelling-16-03-2020.pdf>

[6] Yang, X., Yu, Y., Xu, J., Shu, H., Liu, H., Wu, Y., ... & Wang, Y. (2020). Clinical course and outcomes of critically ill patients with SARS-CoV-2 pneumonia in Wuhan, China: a single-centered, retrospective, observational study. *The Lancet Respiratory Medicine*.

[7] Zhou, F., Yu, T., Du, R., Fan, G., Liu, Y., Liu, Z., ... & Guan, L. (2020). Clinical course and risk factors for mortality of adult inpatients with COVID-19 in Wuhan, China: a retrospective cohort study. *The Lancet*.

[8] American Hospital Association. (2018). AHA Annual Survey. 2018. Pennsylvania, PA: Wharton Research Data Services.
